# Supplementary material
Source: MDPI journal article supplement (https://www.mdpi.com/2227-9040/11/7/365)
Supplement: s1 [file s1 › chemosensors-2403792-supplementary.pdf]

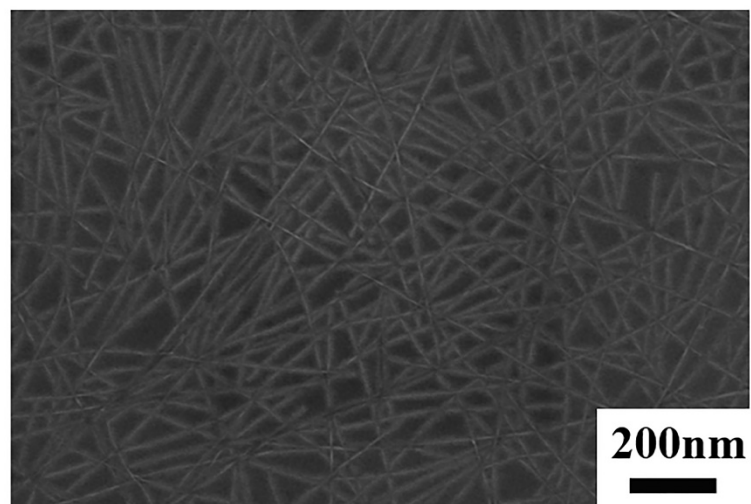

**Figure S1.** The FE-SEM image of the CNTs.

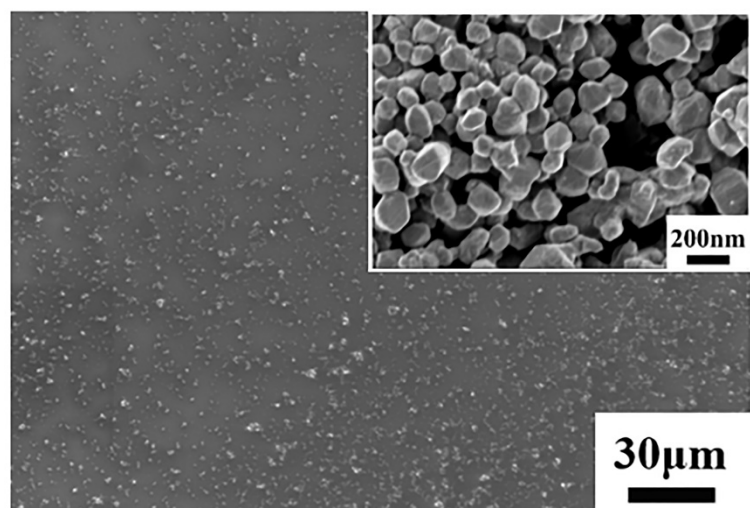

**Figure S2.** FE-SEM image of Pd@VO<sub>2</sub> and the inset shows FE-SEM image at high magnification.

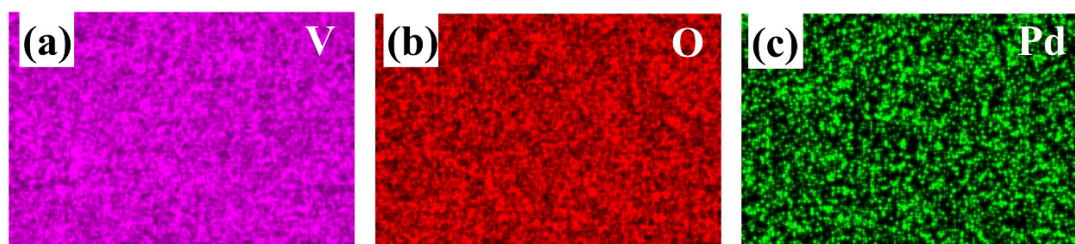

**Figure S3.** The EDS mapping of elements (a) V, (b) O and (c) Pd.

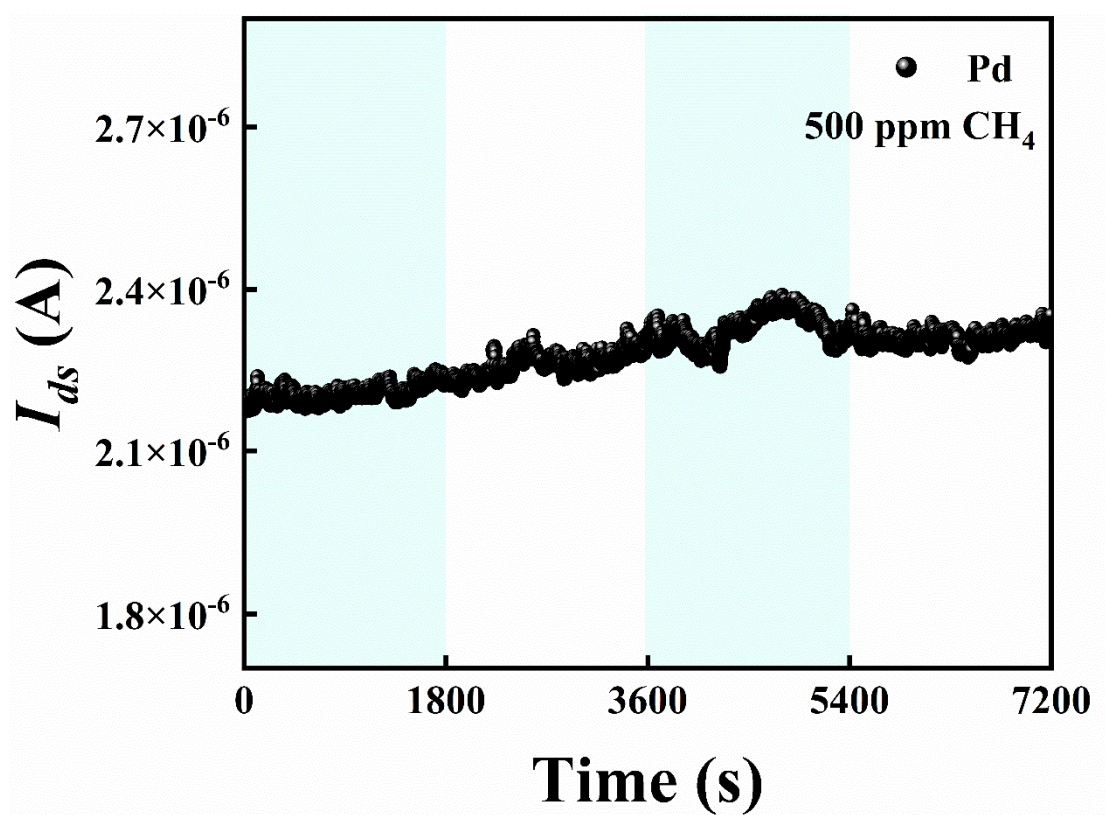

**Figure S4.** Two-cycle test of Pd-modified CNTs sensor for 500 ppm methane at room temperature.
